# Supplementary figures and images for: Robust Sales Forecasting Using Deep Learning with Static and Dynamic Covariates
Source: Preprints.org preprint supplement (doi:10.20944/preprints202308.0427.v1), 2023-08-04

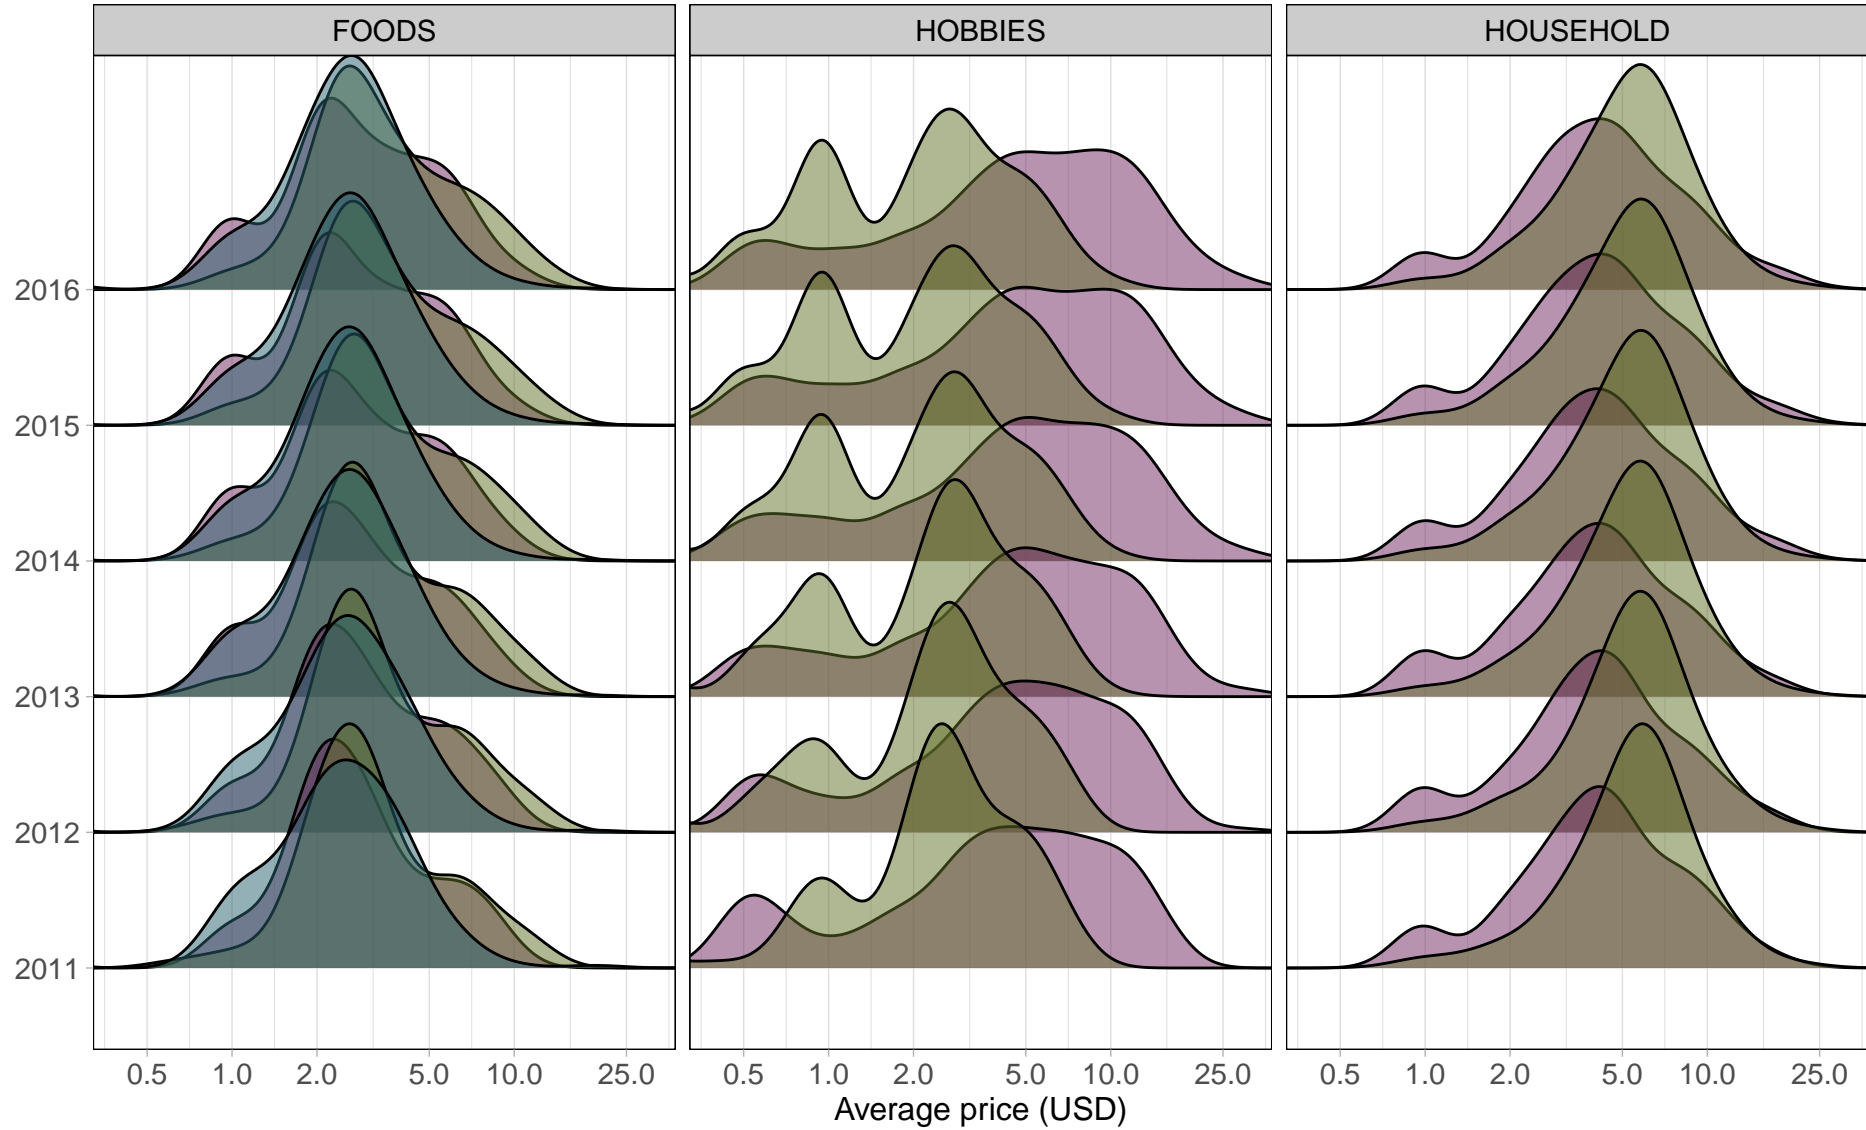

Supplement: Supplementary file 1 [file supplementary]

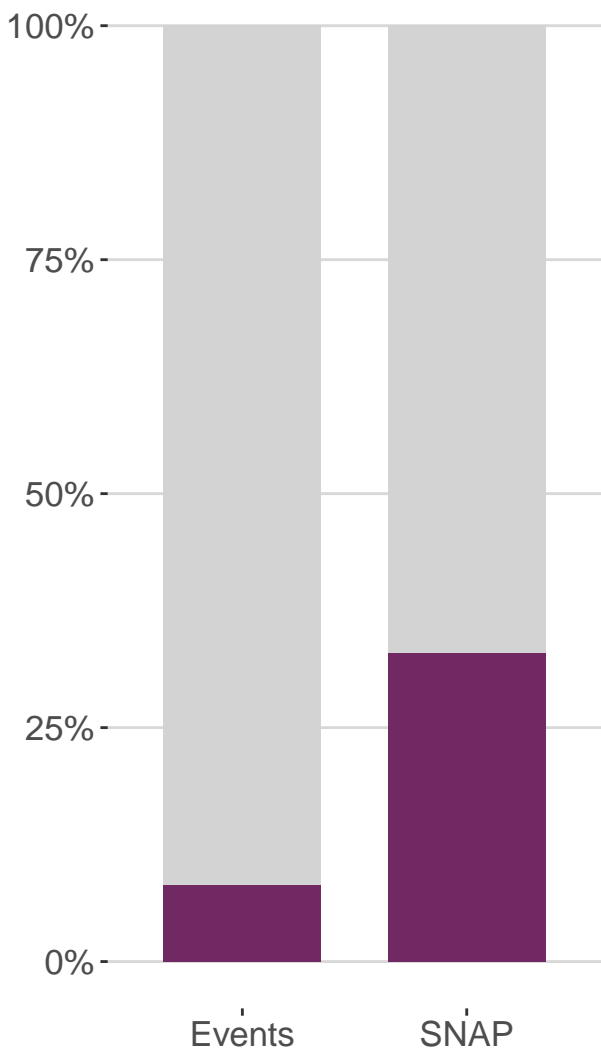

Supplement: Supplementary file 2 [file supplementary]

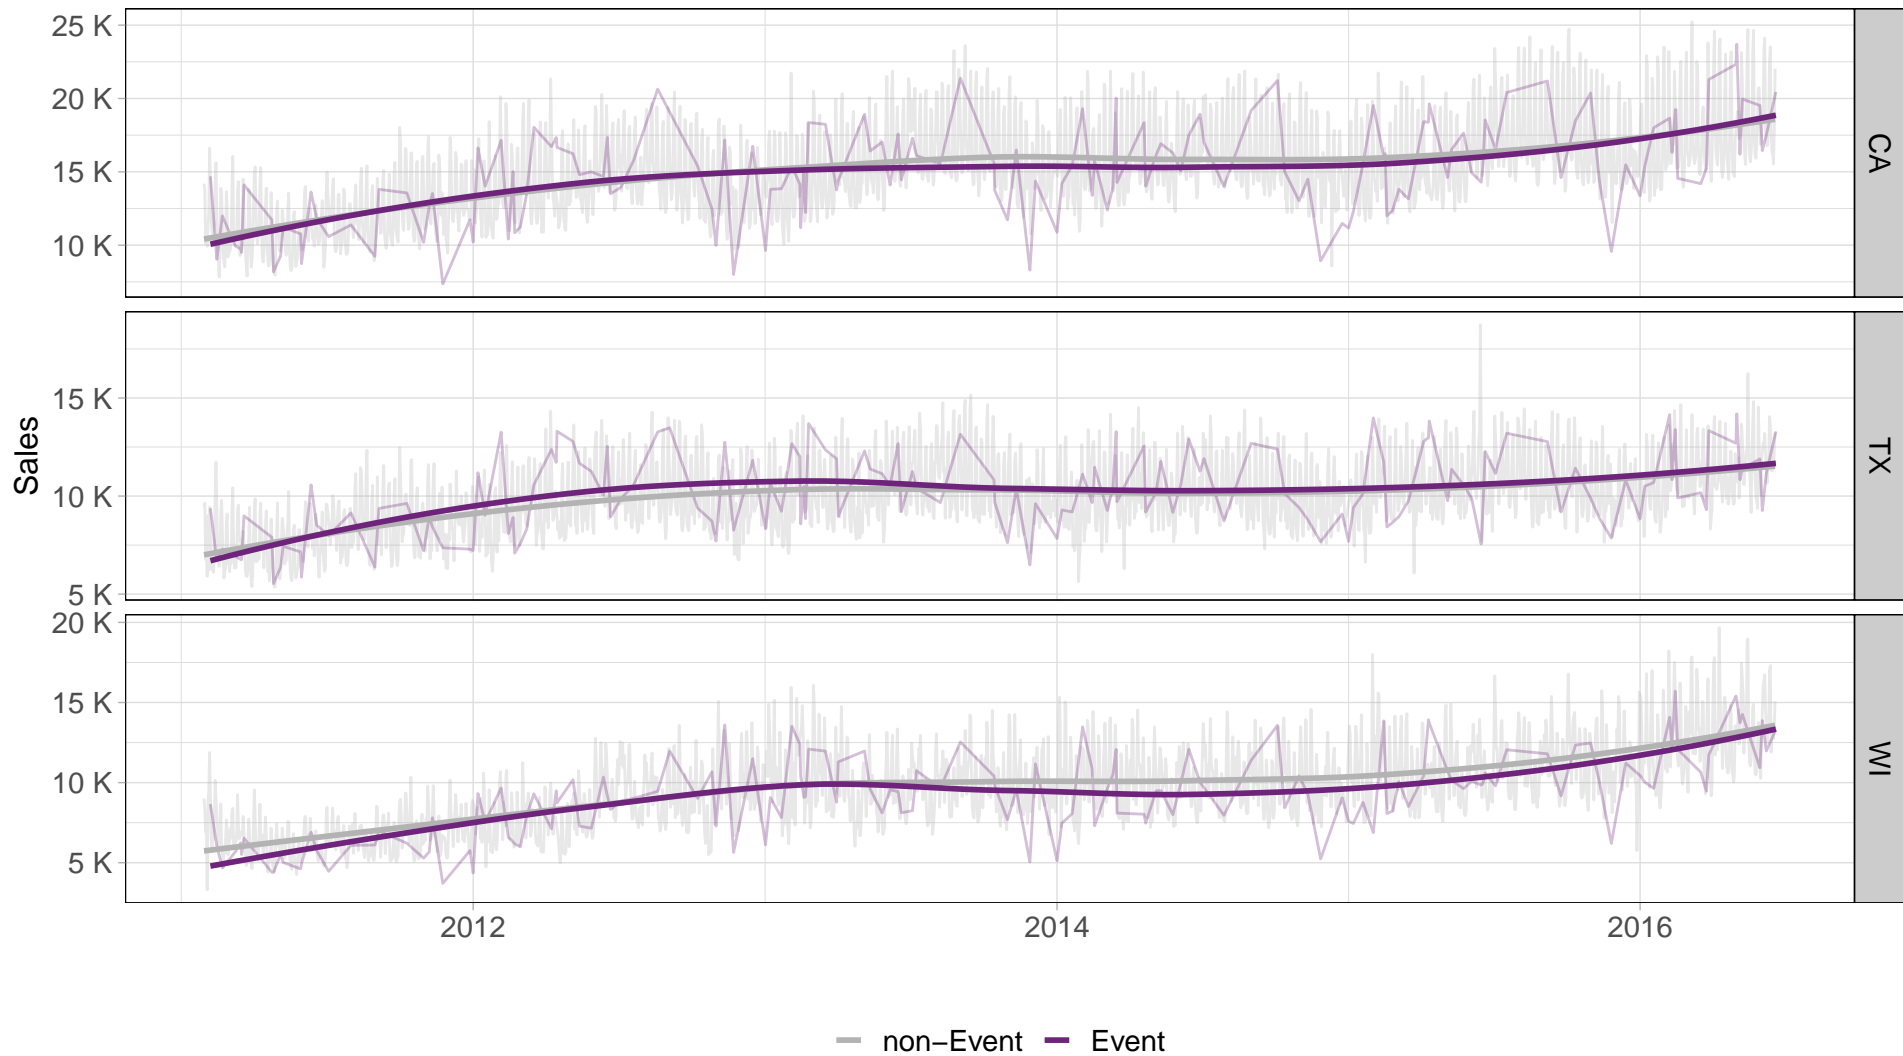

Supplement: Supplementary file 3 [file supplementary]

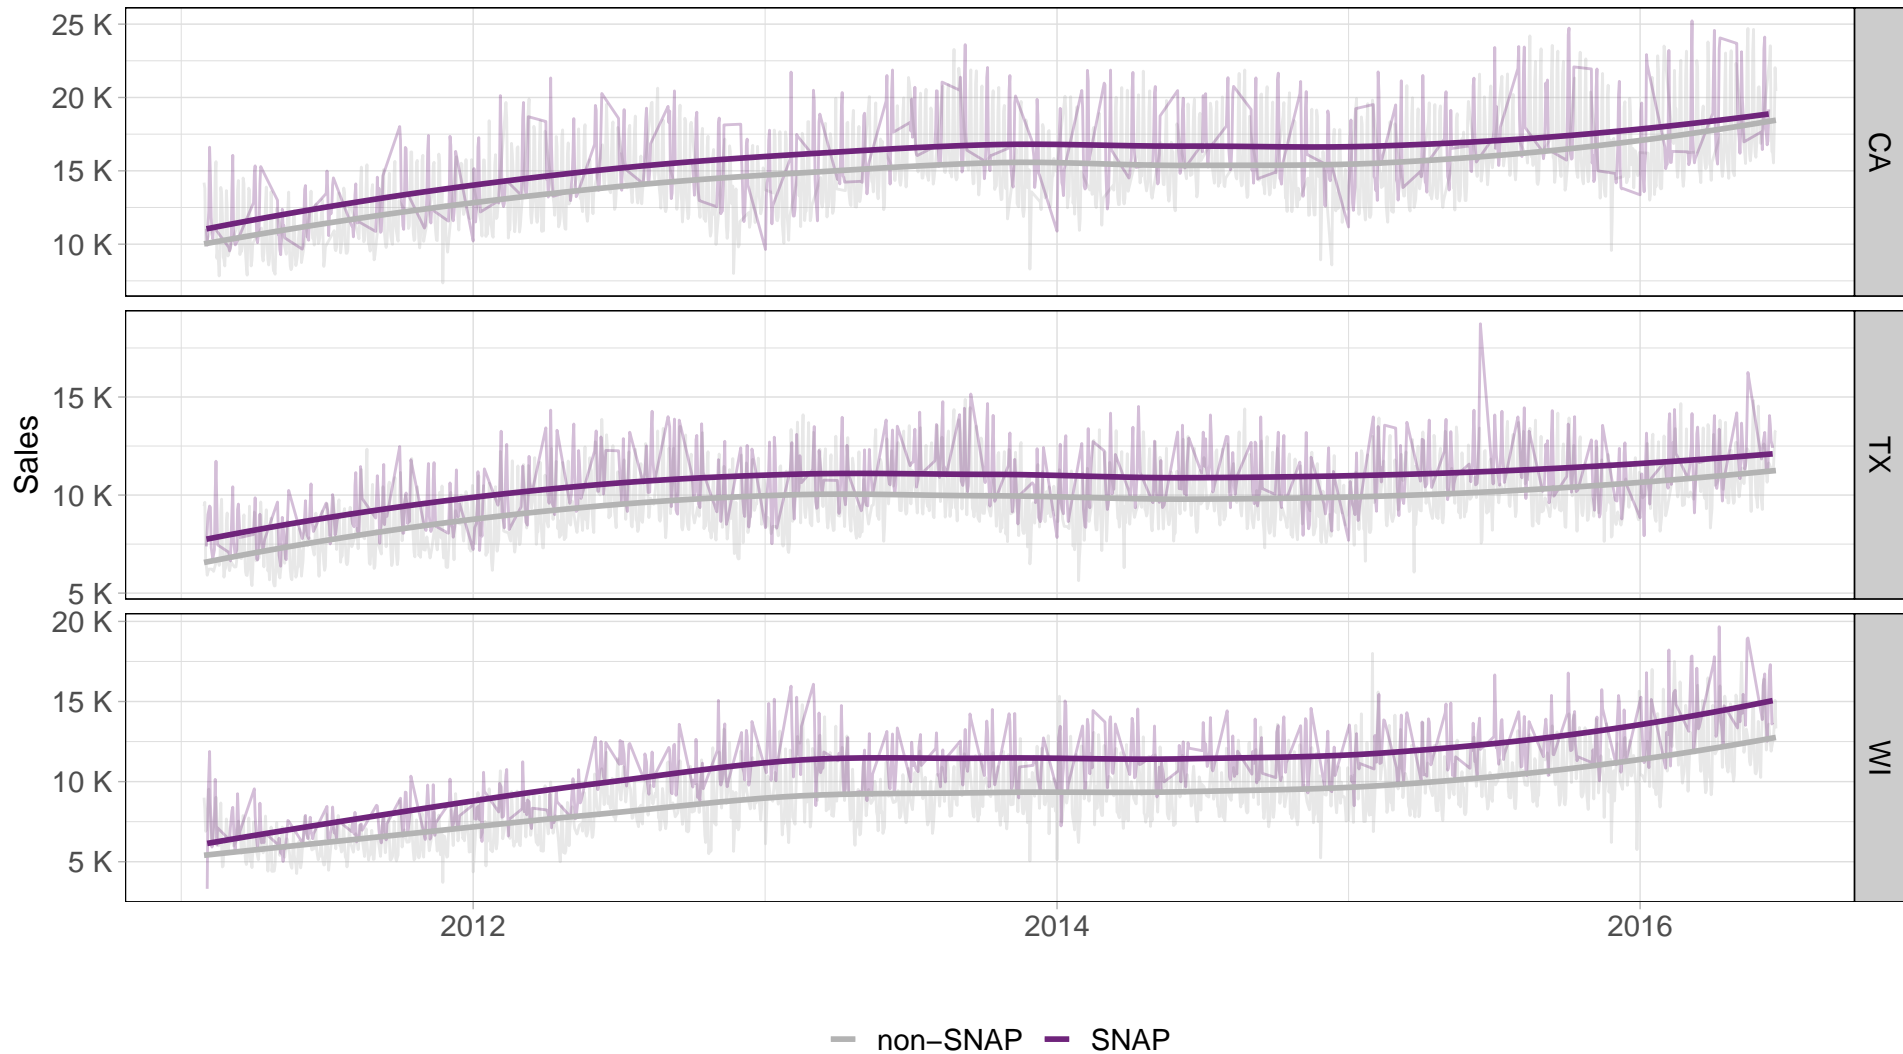

Supplement: Supplementary file 4 [file supplementary]

Types of events

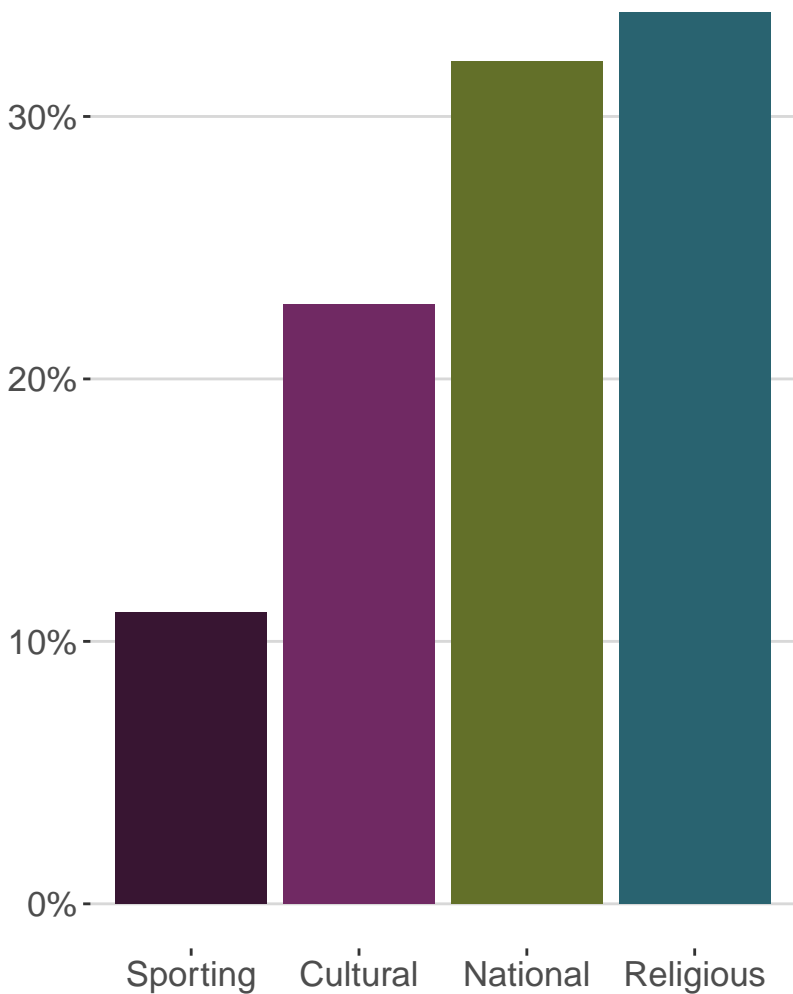

Supplement: Supplementary file 5 [file supplementary]

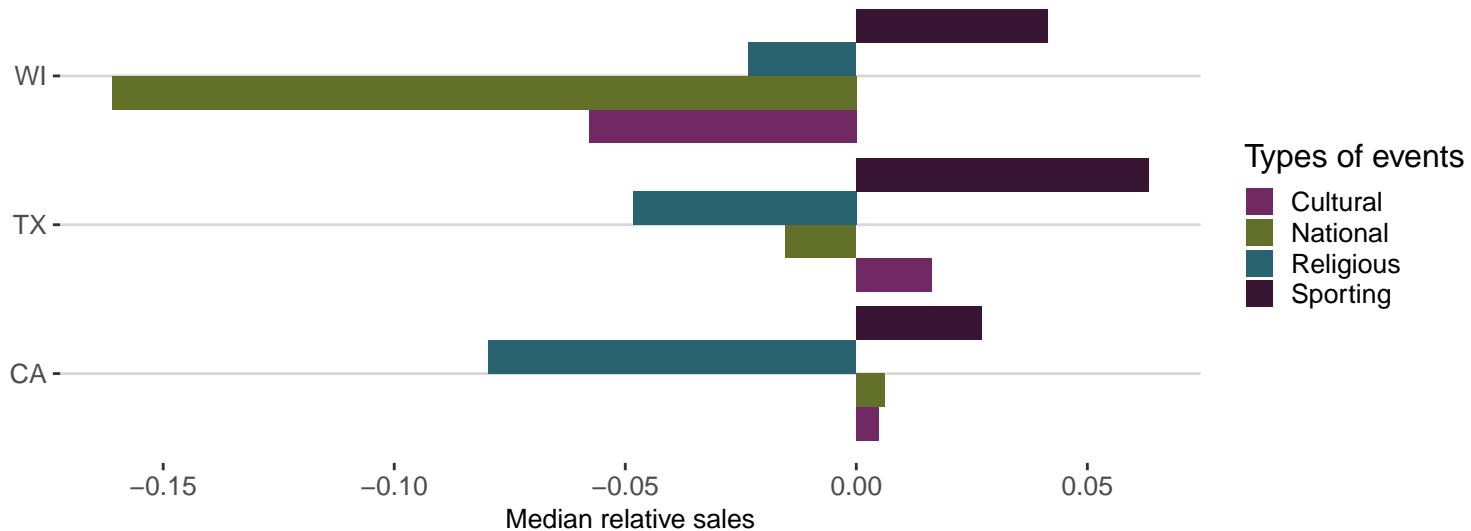

Supplement: Supplementary file 6 [file supplementary]
